# Supplementary material
Source: MDPI journal article supplement (https://www.mdpi.com/2076-3271/10/1/4)
Supplement: s1 [file s1]

**Supplementary Table S1.** Clinicopathological characteristics of gastric cancer patients according to the c-MET, RhoA and CLDN18 groups.

| Variables                                    | c-MET (–)<br><i>n</i> = 180 (%) | c-MET(+)<br><i>n</i> = 169 (%) | <i>p</i>         | Low-RHOA<br><i>n</i> = 174 (%) | High-RHOA<br><i>n</i> = 169 (%) | <i>p</i>         | Low-CLDN18<br><i>n</i> = 173 (%) | High-CLDN18<br><i>n</i> = 176 (%) | <i>p</i>     |
|----------------------------------------------|---------------------------------|--------------------------------|------------------|--------------------------------|---------------------------------|------------------|----------------------------------|-----------------------------------|--------------|
| <b>BMI (Kg/cm<sup>2</sup>)</b>               |                                 |                                | 0.844            |                                |                                 | 0.455            |                                  |                                   | 0.101        |
| Mean (SD)                                    | 24.2 (5.3)                      | 24.1 (5.4)                     |                  | 24.3 (5.5)                     | 23.9 (5.1)                      |                  | 23.6 (5.3)                       | 24.6 (5.3)                        |              |
| <b>Hemoglobin (g/dL)</b>                     |                                 |                                | 0.222            |                                |                                 | 0.443            |                                  |                                   | 0.562        |
| Mean (SD)                                    | 12.0 (2.3)                      | 12.3 (2.3)                     |                  | 12.0 (2.3)                     | 12.2 (2.2)                      |                  | 12.2 (2.2)                       | 12.1 (2.3)                        |              |
| <b>Albumin (g/dL)</b>                        |                                 |                                | 0.792            |                                |                                 | 0.653            |                                  |                                   | 0.521        |
| Mean (SD)                                    | 4.1 (2.4)                       | 4.1 (0.6)                      |                  | 4.1 (2.5)                      | 4.1 (0.5)                       |                  | 4.2 (2.5)                        | 4.0 (0.6)                         |              |
| <b>Neutrophil lymphocyte ratio (NLR)</b>     |                                 |                                | 0.743            |                                |                                 | 0.648            |                                  |                                   | 0.493        |
| Mean (SD)                                    | 2.74 (3.00)                     | 2.64 (2.58)                    |                  | 2.62 (2.89)                    | 2.76 (2.76)                     |                  | 2.80 (3.01)                      | 2.60 (5.56)                       |              |
| <b>Charlson–Deyo Comorbidity Index (CCI)</b> |                                 |                                | 0.710            |                                |                                 | 0.524            |                                  |                                   | 0.801        |
| 0–1                                          | 168 (93.3)                      | 156 (92.3)                     |                  | 160 (92)                       | 164 (93.7)                      |                  | 160 (92.5)                       | 164 (93.2)                        |              |
| > 1                                          | 12 (6.7)                        | 12 (7.7)                       |                  | 14 (8)                         | 11 (6.3)                        |                  | 13 (7.5)                         | 12 (6.8)                          |              |
| <b>pM status</b>                             |                                 |                                | 0.809            |                                |                                 | 0.337            |                                  |                                   | 0.749        |
| pM0                                          | 175 (97.2)                      | 165 (97.6)                     |                  | 168 (96.6)                     | 172 (98.3)                      |                  | 168 (97.1)                       | 172 (97.7)                        |              |
| pM1                                          | 5 (2.8)                         | 4 (2.4)                        |                  | 6 (3.3)                        | 3 (1.7)                         |                  | 5 (2.9)                          | 4 (2.3)                           |              |
| <b>c-MET (H-score)</b>                       |                                 |                                | —                |                                |                                 | <b>&lt;0.001</b> |                                  |                                   | <b>0.031</b> |
| Mean (SD)                                    | —                               | —                              |                  | 12.7 (31.6)                    | 28.6 (39.9)                     |                  | 24.9 (38.6)                      | 16.5 (34.5)                       |              |
| <b>RhoA (%)</b>                              |                                 |                                | <b>&lt;0.001</b> |                                |                                 | —                |                                  |                                   | 0.185        |
| Mean (SD)                                    | 26.2 (28)                       | 46.9 (28.3)                    |                  | —                              | —                               |                  | 34.1 (30.6)                      | 38.3 (29.2)                       |              |
| <b>Claudin 18 (%)</b>                        |                                 |                                | 0.113            |                                |                                 | 0.989            |                                  |                                   | 0.185        |
| Mean (SD)                                    | 37.5 (29.9)                     | 32.4 (29.8)                    |                  | 35.1 (30.5)                    | 35.0 (29.4)                     |                  | 34.1 (30.6)                      | 38.3 (29.2)                       |              |
| <b>Postoperative complication (POC)</b>      |                                 |                                | 0.693            |                                |                                 | 0.462            |                                  |                                   | 0.602        |
| No                                           |                                 |                                |                  |                                |                                 |                  |                                  |                                   |              |
| POC/Clavien I-II                             | 155 (86.1)                      | 143 (84.6)                     |                  | 151 (86.8)                     | 147 (84)                        |                  | 146 (84.4)                       | 152 (86.4)                        |              |
| Clavien III-V                                | 25 (13.9)                       | 26 (15.4)                      |                  | 23 (13.2)                      | 28 (16)                         |                  | 27 (15.6)                        | 24 (13.6)                         |              |
| <b>Chemotherapy (all)</b>                    |                                 |                                | 0.382            |                                |                                 | 0.119            |                                  |                                   | 0.231        |
| No                                           | 80 (44.4)                       | 83 (49.1)                      |                  | 74 (42.5)                      | 89 (50.9)                       |                  | 75 (43.4)                        | 88 (50)                           |              |
| Yes                                          | 100 (55.6)                      | 86 (50.9)                      |                  | 100 (57.5)                     | 86 (49.1)                       |                  | 98 (56.6)                        | 88 (50)                           |              |
| <b>Disease recurrence</b>                    |                                 |                                | na               |                                |                                 | na               |                                  |                                   | na           |
| No                                           | 114 (63.3)                      | 130 (79.9)                     |                  | 110 (63.2)                     | 134 (76.6)                      |                  | 123 (71.1)                       | 121 (68.8)                        |              |
| Yes                                          | 66 (36.7)                       | 39 (23.1)                      |                  | 64 (36.8)                      | 41 (23.4)                       |                  | 50 (28.9)                        | 55 (31.2)                         |              |
| <b>Death</b>                                 |                                 |                                | na               |                                |                                 | na               |                                  |                                   | na           |
| No                                           | 91 (50.6)                       | 101 (59.8)                     |                  | 94 (54)                        | 98 (56)                         |                  | 93 (53.8)                        | 99 (56.2)                         |              |
| Yes                                          | 89 (49.4)                       | 68 (40.2)                      |                  | 80 (46)                        | 77 (44)                         |                  | 80 (46.2)                        | 77 (43.8)                         |              |

BMI, body mass index; SD, standard deviation. *p*-values in bold are statistically significant.

**Supplementary Table S2.** Pearson correlation test for IHC markers

|                   |                                       | <b>c-MET</b> | <b>RhoA</b> | <b>CLDN18</b> |
|-------------------|---------------------------------------|--------------|-------------|---------------|
| <b>c-MET</b>      | Pearson Correlation coefficient ( r ) | —            | 0.250       | – 0.139       |
|                   | <i>p</i> -value                       | —            | <0.001      | 0.010         |
| <b>RhoA</b>       | Pearson Correlation coefficient ( r ) | 0.250        | —           | 0.023         |
|                   | <i>p</i> -value                       | <0.001       | —           | 0.664         |
| <b>CLDN18</b>     | Pearson Correlation coefficient ( r ) | – 0.139      | 0.023       | —             |
|                   | <i>p</i> -value                       | 0.010        | 0.664       | —             |
| <b>HER2</b>       | Pearson Correlation coefficient ( r ) | 0.160        | 0.049       | – 0.107       |
|                   | <i>p</i> -value                       | 0.002        | 0.376       | 0.052         |
| <b>E-cadherin</b> | Pearson Correlation coefficient ( r ) | – 0.122      | – 0.125     | 0.025         |
|                   | <i>p</i> -value                       | 0.028        | 0.024       | 0.657         |
